# Supplementary material for: Genetic evidence that raised sex hormone binding globulin (SHBG) levels reduce the risk of type 2 diabetes
Source: PubMed Central journal article supplement — Hum Mol Genet. 2009 Nov 18;19(3):535–44. doi: 10.1093/hmg/ddp522 (PMC2798726; doi:10.1093/hmg/ddp522), 2009-11-18
Supplement: ddp522_1.pdf [file ddp522_1.pdf]

**Supplementary table 1.** Genotyping details and quality control.

| Study                                           | Genotyping method                                                                                                          | HWE P  | Call Rate | Imputed                | Other Info                                                     |
|-------------------------------------------------|----------------------------------------------------------------------------------------------------------------------------|--------|-----------|------------------------|----------------------------------------------------------------|
| WTCCC                                           | Kbiosciences allele-specific PCR (KASPar)                                                                                  | > 0.05 | > 0.95    | No                     |                                                                |
| Dundee_Cases                                    | Kbiosciences allele-specific PCR (KASPar)                                                                                  | 0.36   | 0.94947   | No                     |                                                                |
| Dundee_Ctrls                                    | Kbiosciences allele-specific PCR (KASPar)                                                                                  | 0.15   | 0.95043   | No                     |                                                                |
| EFS-Y2D                                         | Kbiosciences allele-specific PCR (KASPar)                                                                                  | 0.93   | 0.9584    | No                     |                                                                |
| Danish                                          | Kbiosciences allele-specific PCR (KASPar)                                                                                  | 0.99   | 0.963     | No                     |                                                                |
| DGI_r20.9_rs12150660                            | MACH Imputation from Affymetrix GeneChip Human Mapping 500k Array Set                                                      | N/A    | N/A       | Yes - MACH rsqr 0.849  |                                                                |
| Malmö_CC                                        | Taqman                                                                                                                     | N/A    | 0.973     | No                     |                                                                |
| FUSION_r20.9_rs12150660                         | MACH imputation from Illumina HumanHap 300                                                                                 | N/A    | N/A       | Yes - MACH rsqr 0.6955 |                                                                |
| KORA                                            | Taqman                                                                                                                     | N/A    | 0.977     | No                     | Discordance rate in 115 routine duplicates = 0%                |
| Cambridgeshire Case Control study               | Taqman                                                                                                                     | > 0.05 | > 0.97    | No                     | 100% concordance rate between duplicates (2.5-3.5% of samples) |
| ADDITION/ELY                                    | Taqman                                                                                                                     | > 0.05 | > 0.97    | No                     | 100% concordance rate between duplicates (2.5-3.5% of samples) |
| Norfolk/BOB Norfolk Diabetes Case Control Study | Taqman                                                                                                                     | > 0.05 | > 0.97    | No                     | 100% concordance rate between duplicates (2.5-3.5% of samples) |
| DeCODE                                          | Centaurus genotyping for 2052 individuals; For others: Imputation based on direct genotyping of 3872 Icelandic individuals | 0.7    | N/A       | Yes, partly            |                                                                |
| FUSION2                                         | iPLEX Sequenom MassARRAY, Typer 4.0 calling algorithm                                                                      | 0.15   | 0.95      | No                     |                                                                |
| METSIM                                          | iPLEX Sequenom MassARRAY, Typer 4.0 calling algorithm                                                                      | 0.14   | 0.94      | No                     |                                                                |
| DIAGEN                                          | iPLEX Sequenom MassARRAY, Typer 4.0 calling algorithm                                                                      | 0.56   | 0.96      | No                     |                                                                |

N/A not available
